# Supplementary material for: Extraction of the trivalent transplutonium actinides americium through einsteinium by the sulfur donor Cyanex 301
Source: Royal Society of Chemistry journal article supplement (doi:10.1039/d1qi00076d), 2021-01-01
Supplement: d1qi00076d1.pdf [file d1qi00076d1.pdf]

## Supplemental Information

### Extraction of the Trivalent Transplutonium Actinides Americium through Einsteinium by the Sulfur Donor Cyanex 301

Nathan Bessen<sup>a</sup>, Qiang Yan<sup>b</sup>, Ning Pu<sup>b</sup>, Jing Chen<sup>b</sup>, Chao Xu<sup>b,\*</sup>, Jenifer Shafer<sup>a,\*</sup>

a: Colorado School of Mines, 1500 Illinois St, Golden, CO 80401

b: Institute of Nuclear and New Energy Technology, Tsinghua University, Beijing 100084, China

## Table of Contents

|                                                                                                                                                                                                                                                                                                                                                        |    |
|--------------------------------------------------------------------------------------------------------------------------------------------------------------------------------------------------------------------------------------------------------------------------------------------------------------------------------------------------------|----|
| Table S1. Emission wavelengths of lanthanides used in ICP-OES .....                                                                                                                                                                                                                                                                                    | 3  |
| Table S2. Calculated thermodynamic parameters for the reaction<br>$M(C301)_3 + NO_3^- \rightleftharpoons MC301_2(NO_3) + C301^-$ . $\Delta G$ is calculated at a temperature of 298.15 K.....                                                                                                                                                          | 4  |
| Figure S1. Structure of 3,4,3-LI(1,2-HOPO).....                                                                                                                                                                                                                                                                                                        | 5  |
| Figure S2. The pH corrected distribution ratio of the lanthanides Pr, Nd, Sm, Eu, Gd, Dy, Ho, Er, Tm, Yb, and Lu.....                                                                                                                                                                                                                                  | 6  |
| Figure S3. FTIR spectra of 20% tributyl phosphate (TBP) dissolved in n-dodecane following contact with 15 M HNO <sub>3</sub> . The TBP organic phase contains 0.17 M H <sub>2</sub> O in this system. No broad band at 1648 cm <sup>-1</sup> is from the TBP·HNO <sub>3</sub> species and no -OH stretch around 3000 cm <sup>-1</sup> is observed..... | 7  |
| Optimized Geometries.....                                                                                                                                                                                                                                                                                                                              | 8  |
| Am(C301) <sub>3</sub> .....                                                                                                                                                                                                                                                                                                                            | 8  |
| Am(C301) <sub>2</sub> (NO <sub>3</sub> ) .....                                                                                                                                                                                                                                                                                                         | 8  |
| Nd(C301) <sub>3</sub> .....                                                                                                                                                                                                                                                                                                                            | 9  |
| Nd(C301) <sub>2</sub> (NO <sub>3</sub> ) .....                                                                                                                                                                                                                                                                                                         | 10 |

**Table S1.** Emission wavelengths of lanthanides used in ICP-OES.

| Metal | Wavelength<br>(nm) | Metal | Wavelength<br>(nm) |
|-------|--------------------|-------|--------------------|
| La    | 398.852            | Dy    | 353.171            |
| Pr    | 422.293            | Ho    | 345.600            |
| Nd    | 430.358            | Er    | 337.271            |
| Sm    | 443.432            | Tm    | 384.802            |
| Eu    | 393.048            | Yb    | 328.937            |
| Gd    | 342.247            | Lu    | 547.669            |

**Table S2.** Calculated thermodynamic parameters for the reaction
$$M(C301)_3 + NO_3^- \rightleftharpoons M(C301)_2(NO_3) + C301^-$$

.  $\Delta G$  is calculated at a temperature of 298.15 K.

| Metal      | $\Delta G$<br>(kJ/mol) | $\Delta H$<br>(kJ/mol) | $\Delta S$<br>(J/mol·K) |
|------------|------------------------|------------------------|-------------------------|
| Lanthanide |                        |                        |                         |
| Ce         | 15.82                  | 18.58                  | 9.25                    |
| Pr         | 12.97                  | 15.48                  | 8.41                    |
| Pm         | 16.40                  | 20.96                  | 15.27                   |
| Sm         | 12.80                  | 31.30                  | 61.97                   |
| Eu         | 19.54                  | 30.96                  | 38.20                   |
| Tb         | 17.28                  | 31.34                  | 47.11                   |
| Dy         | 15.23                  | 26.44                  | 37.57                   |
| Ho         | 8.24                   | 30.96                  | 76.27                   |
| Er         | 6.90                   | 27.20                  | 67.95                   |
| Tm         | 4.48                   | 31.34                  | 90.17                   |
| Lu         | 6.95                   | 26.19                  | 64.68                   |
| Actinide   |                        |                        |                         |
| Am         | 19.04                  | 21.84                  | 9.29                    |
| Cm         | 18.62                  | 22.51                  | 13.01                   |
| Bk         | 23.22                  | 29.16                  | 20.04                   |
| Cf         | 21.09                  | 27.07                  | 20.08                   |
| Es         | 23.81                  | 31.05                  | 24.31                   |

**Figure S1.** Structure of 3,4,3-LI(1,2-HOPO).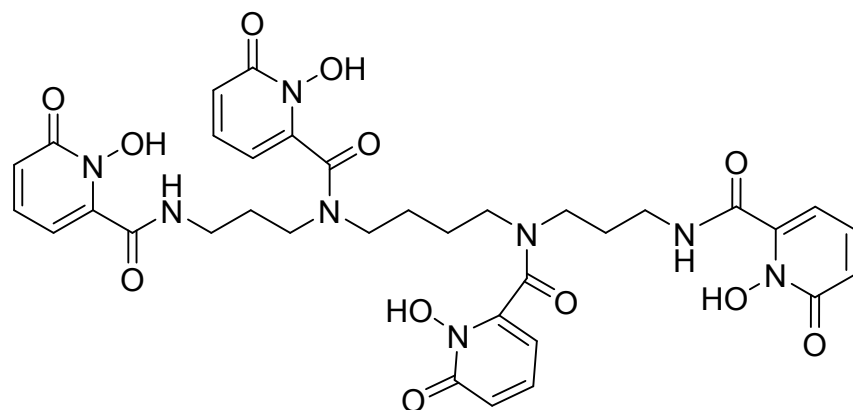

**Figure S2.** The pH corrected distribution ratio of the lanthanides Pr, Nd, Sm, Eu, Gd, Dy, Ho, Er, Tm, Yb, and Lu with 0.5024 M HC301 at an average  $pC_{H^+}$  of 4.46. The value for  $n_{H^+}$  (1.13) was obtained from radiotracer experiments with Eu.

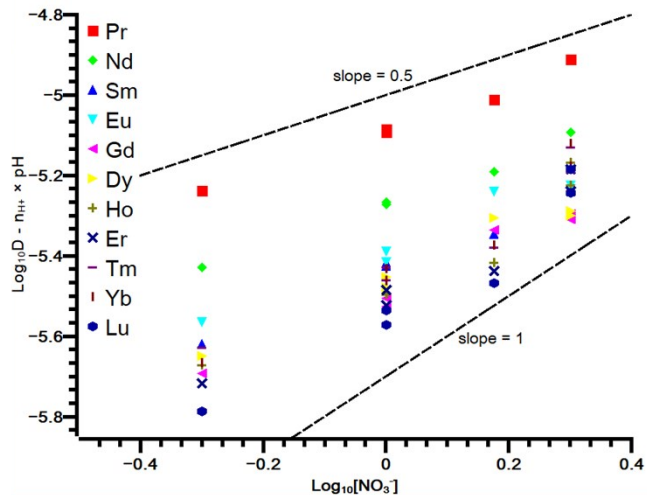

**Figure S3.** FTIR spectra of 20% tributyl phosphate (TBP) dissolved in n-dodecane following contact with 15 M HNO<sub>3</sub>. The TBP organic phase contains 0.17 M H<sub>2</sub>O in this system. No broad -OH stretch around 3000 cm<sup>-1</sup> is observed. The band at 1648 cm<sup>-1</sup> is from the TBP·HNO<sub>3</sub> species and no -OH stretch around 3000 cm<sup>-1</sup> is observed. Water content was determined by Karl Fischer titration.

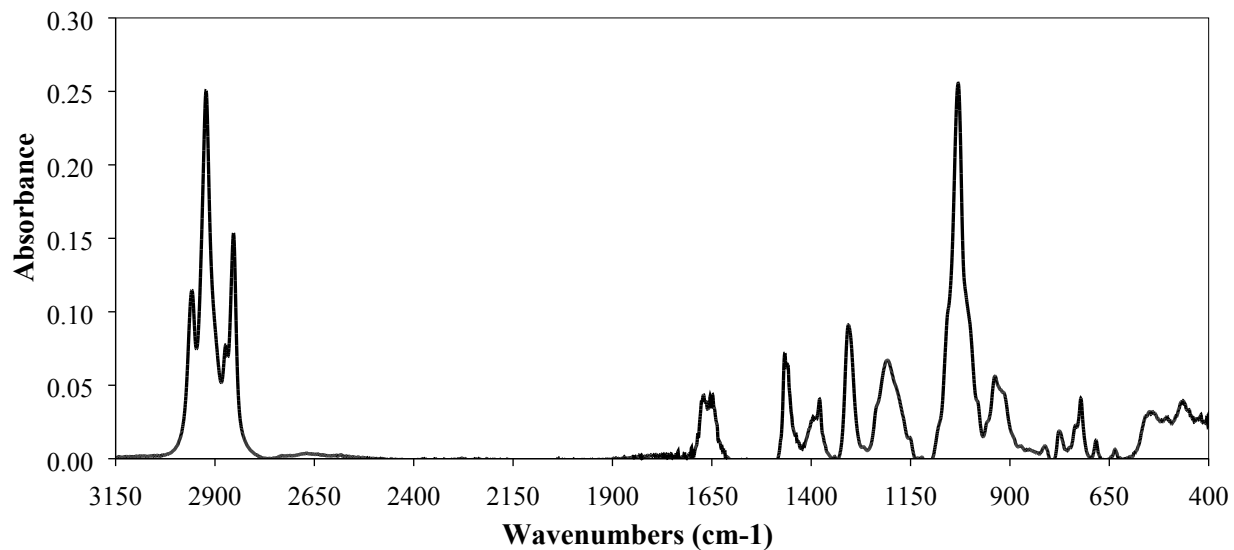

[1] Ferraro, J.R., Borkowski, M., Chiarizia, R. and McAlister, D.R., 2001. FT-IR spectroscopy of nitric acid in TBP/octane solution. *Solvent Extraction and Ion Exchange*, 19(6), pp.981-992.

**Optimized Geometries.**

Coordinates are representative of the optimized structures of all lanthanide and actinide complexes modeled.

**Am(C301)<sub>3</sub>**

|    |             |             |             |
|----|-------------|-------------|-------------|
| C  | -3.34540759 | -2.90041902 | 0.80716076  |
| S  | 2.44053787  | -0.81160548 | -1.48082444 |
| Am | 0.17554057  | -0.00000000 | -0.00000000 |
| S  | 2.44053787  | 0.81160548  | 1.48082444  |
| S  | -0.27618505 | 2.42071506  | -1.38337778 |
| S  | -1.75162280 | -1.42866993 | -1.48995462 |
| S  | -1.75162280 | 1.42866993  | 1.48995462  |
| S  | -0.27618505 | -2.42071506 | 1.38337778  |
| P  | -1.71980314 | -2.82918494 | -0.00364666 |
| P  | -1.71980314 | 2.82918494  | 0.00364666  |
| P  | 3.59035078  | -0.00000000 | -0.00000000 |
| C  | 4.68474461  | 1.27289595  | -0.69646039 |
| C  | -1.44489696 | -4.47974795 | -0.71433944 |
| C  | -3.34540759 | 2.90041902  | -0.80716076 |
| C  | -1.44489696 | 4.47974795  | 0.71433944  |
| C  | 4.68474461  | -1.27289595 | 0.69646039  |
| H  | -3.32497382 | -3.67550359 | 1.58562711  |
| H  | -4.10999205 | -3.14000985 | 0.05556288  |
| H  | -3.56102288 | -1.92437908 | 1.25910754  |
| H  | 5.31075974  | 1.68282731  | 0.10785318  |
| H  | 4.07270692  | 2.07017125  | -1.13521300 |
| H  | 5.31654123  | 0.81759495  | -1.47115287 |
| H  | -0.47477649 | -4.49393937 | -1.22550142 |
| H  | -2.24814063 | -4.69827238 | -1.43117171 |
| H  | -1.45141463 | -5.22076609 | 0.09693026  |
| H  | -3.32497382 | 3.67550359  | -1.58562711 |
| H  | -4.10999205 | 3.14000985  | -0.05556288 |
| H  | -3.56102288 | 1.92437908  | -1.25910754 |
| H  | -0.47477649 | 4.49393937  | 1.22550142  |
| H  | -2.24814063 | 4.69827238  | 1.43117171  |
| H  | -1.45141463 | 5.22076609  | -0.09693026 |
| H  | 5.31075974  | -1.68282731 | -0.10785318 |
| H  | 4.07270692  | -2.07017125 | 1.13521300  |
| H  | 5.31654123  | -0.81759495 | 1.47115287  |

**Am(C301)<sub>2</sub>(NO<sub>3</sub>)**

|   |             |             |             |
|---|-------------|-------------|-------------|
| O | -2.08009326 | -3.99843583 | 0.40082905  |
| S | 2.18503174  | -1.06214484 | -1.43257272 |



|    |             |             |             |
|----|-------------|-------------|-------------|
| Am | -0.22581121 | -0.33847483 | -0.18537492 |
| S  | 1.81115292  | 0.61258194  | 1.47816941  |
| S  | -0.42862827 | 2.02988095  | -1.69289553 |
| O  | -2.07550158 | -1.98287868 | -0.49752654 |
| S  | -2.12141053 | 1.27884741  | 1.11901539  |
| O  | -0.40104486 | -2.61139321 | 0.76577400  |
| N  | -1.54344889 | -2.90751348 | 0.22868136  |
| P  | -1.61680622 | 2.75740601  | -0.20119486 |
| P  | 3.12959341  | -0.00910651 | 0.04456802  |
| C  | 3.97320927  | 1.43349830  | -0.67198059 |
| H  | 4.94116695  | -0.43405572 | 1.57194302  |
| C  | -3.11924119 | 3.49887800  | -0.90255620 |
| C  | -0.75991216 | 4.09689564  | 0.67904529  |
| C  | 4.43131120  | -1.02668117 | 0.80018601  |
| H  | -3.67090351 | 2.73459940  | -1.46272703 |
| H  | 0.16662852  | 3.70022558  | 1.11260115  |
| H  | -1.41284028 | 4.47829379  | 1.47587948  |
| H  | 4.49913692  | 1.97177275  | 0.12854954  |
| H  | 3.22460969  | 2.08941724  | -1.13273979 |
| H  | 4.69094063  | 1.09174139  | -1.42983871 |
| H  | -0.52709858 | 4.90033821  | -0.03287213 |
| H  | 5.14594848  | -1.32513548 | 0.02091284  |
| H  | 3.97664751  | -1.91690877 | 1.25133182  |
| H  | -2.83074773 | 4.32038971  | -1.57261928 |
| H  | -3.73985718 | 3.88419863  | -0.08201920 |

Nd(C301)<sub>3</sub>

|    |             |             |             |
|----|-------------|-------------|-------------|
| C  | -3.43167915 | -3.09919259 | 0.62759237  |
| S  | 2.37064894  | -0.65924721 | -1.55212679 |
| Nd | 0.08229736  | -0.00000000 | -0.00000000 |
| S  | 2.37064894  | 0.65924721  | 1.55212679  |
| S  | -0.50374026 | 2.31632678  | -1.53587528 |
| S  | -1.68989403 | -1.59942057 | -1.54110284 |
| S  | -1.68989403 | 1.59942057  | 1.54110284  |
| S  | -0.50374026 | -2.31632678 | 1.53587528  |
| P  | -1.73044472 | -2.92027327 | 0.01701285  |
| P  | -1.73044472 | 2.92027327  | -0.01701285 |
| P  | 3.52405082  | -0.00000000 | -0.00000000 |
| C  | 4.61646956  | 1.33571405  | -0.56576223 |
| C  | -1.23073930 | -4.56859465 | -0.55986451 |
| C  | -3.43167915 | 3.09919259  | -0.62759237 |
| C  | -1.23073930 | 4.56859465  | 0.55986451  |
| C  | 4.61646956  | -1.33571405 | 0.56576223  |
| H  | -3.44229504 | -3.82804748 | 1.44939736  |

|   |             |             |             |
|---|-------------|-------------|-------------|
| H | -4.07041458 | -3.44969504 | -0.19454435 |
| H | -3.78812902 | -2.12657711 | 0.98777975  |
| H | 5.24215518  | 1.66563980  | 0.27453171  |
| H | 4.00389783  | 2.17136438  | -0.92469667 |
| H | 5.24878762  | 0.95946486  | -1.38125829 |
| H | -0.20384353 | -4.51751827 | -0.94127244 |
| H | -1.91114049 | -4.88751262 | -1.36120420 |
| H | -1.28281311 | -5.27357326 | 0.28082098  |
| H | -3.44229504 | 3.82804748  | -1.44939736 |
| H | -4.07041458 | 3.44969504  | 0.19454435  |
| H | -3.78812902 | 2.12657711  | -0.98777975 |
| H | -0.20384353 | 4.51751827  | 0.94127244  |
| H | -1.91114049 | 4.88751262  | 1.36120420  |
| H | -1.28281311 | 5.27357326  | -0.28082098 |
| H | 5.24215518  | -1.66563980 | -0.27453171 |
| H | 4.00389783  | -2.17136438 | 0.92469667  |
| H | 5.24878762  | -0.95946486 | 1.38125829  |

Nd(C301)<sub>2</sub>(NO<sub>3</sub>)

|    |             |             |             |
|----|-------------|-------------|-------------|
| O  | -1.99653200 | -3.46276900 | 0.05279800  |
| S  | 2.32270100  | -0.52985600 | -1.54692900 |
| Nd | 0.05199000  | 0.12449100  | -0.00637000 |
| S  | 2.27862100  | 0.40235400  | 1.69382900  |
| S  | -0.79490500 | 2.19237700  | -1.72250200 |
| O  | -1.30872800 | -1.66254000 | -1.02562600 |
| S  | -1.59892900 | 1.82262600  | 1.53178000  |
| O  | -0.79647600 | -1.92393400 | 1.08672400  |
| N  | -1.39324500 | -2.39628400 | 0.03918500  |
| P  | -1.84212400 | 2.96636000  | -0.14489100 |
| P  | 3.45252400  | -0.16141200 | 0.11684000  |
| C  | 4.66790300  | 1.13819400  | -0.23954900 |
| H  | 5.02132300  | -1.42238700 | 1.43626400  |
| C  | -3.60344300 | 3.07343800  | -0.56995500 |
| C  | -1.29550500 | 4.66585900  | 0.18221900  |
| C  | 4.40252700  | -1.64418100 | 0.55637100  |
| H  | -3.98452600 | 2.06635800  | -0.77667500 |
| H  | -0.23051000 | 4.65747500  | 0.44254100  |
| H  | -1.88167700 | 5.07304900  | 1.01709400  |
| H  | 5.28257500  | 1.30660800  | 0.65499000  |
| H  | 4.13884200  | 2.06021500  | -0.50852600 |
| H  | 5.30059700  | 0.81285400  | -1.07634700 |
| H  | -1.45510000 | 5.27091900  | -0.72059000 |
| H  | 5.04172100  | -1.92327000 | -0.29201000 |
| H  | 3.70740000  | -2.46091800 | 0.78487900  |
| H  | -3.71585000 | 3.70650700  | -1.46039800 |
| H  | -4.14914400 | 3.51410300  | 0.27542200  |
